# Supplementary material
Source: Springer Nature journal article supplement (https://www.springermedizin.de/resource/supplementary/13054_2012_1681_MOESM2_ESM.pdf/9711250)

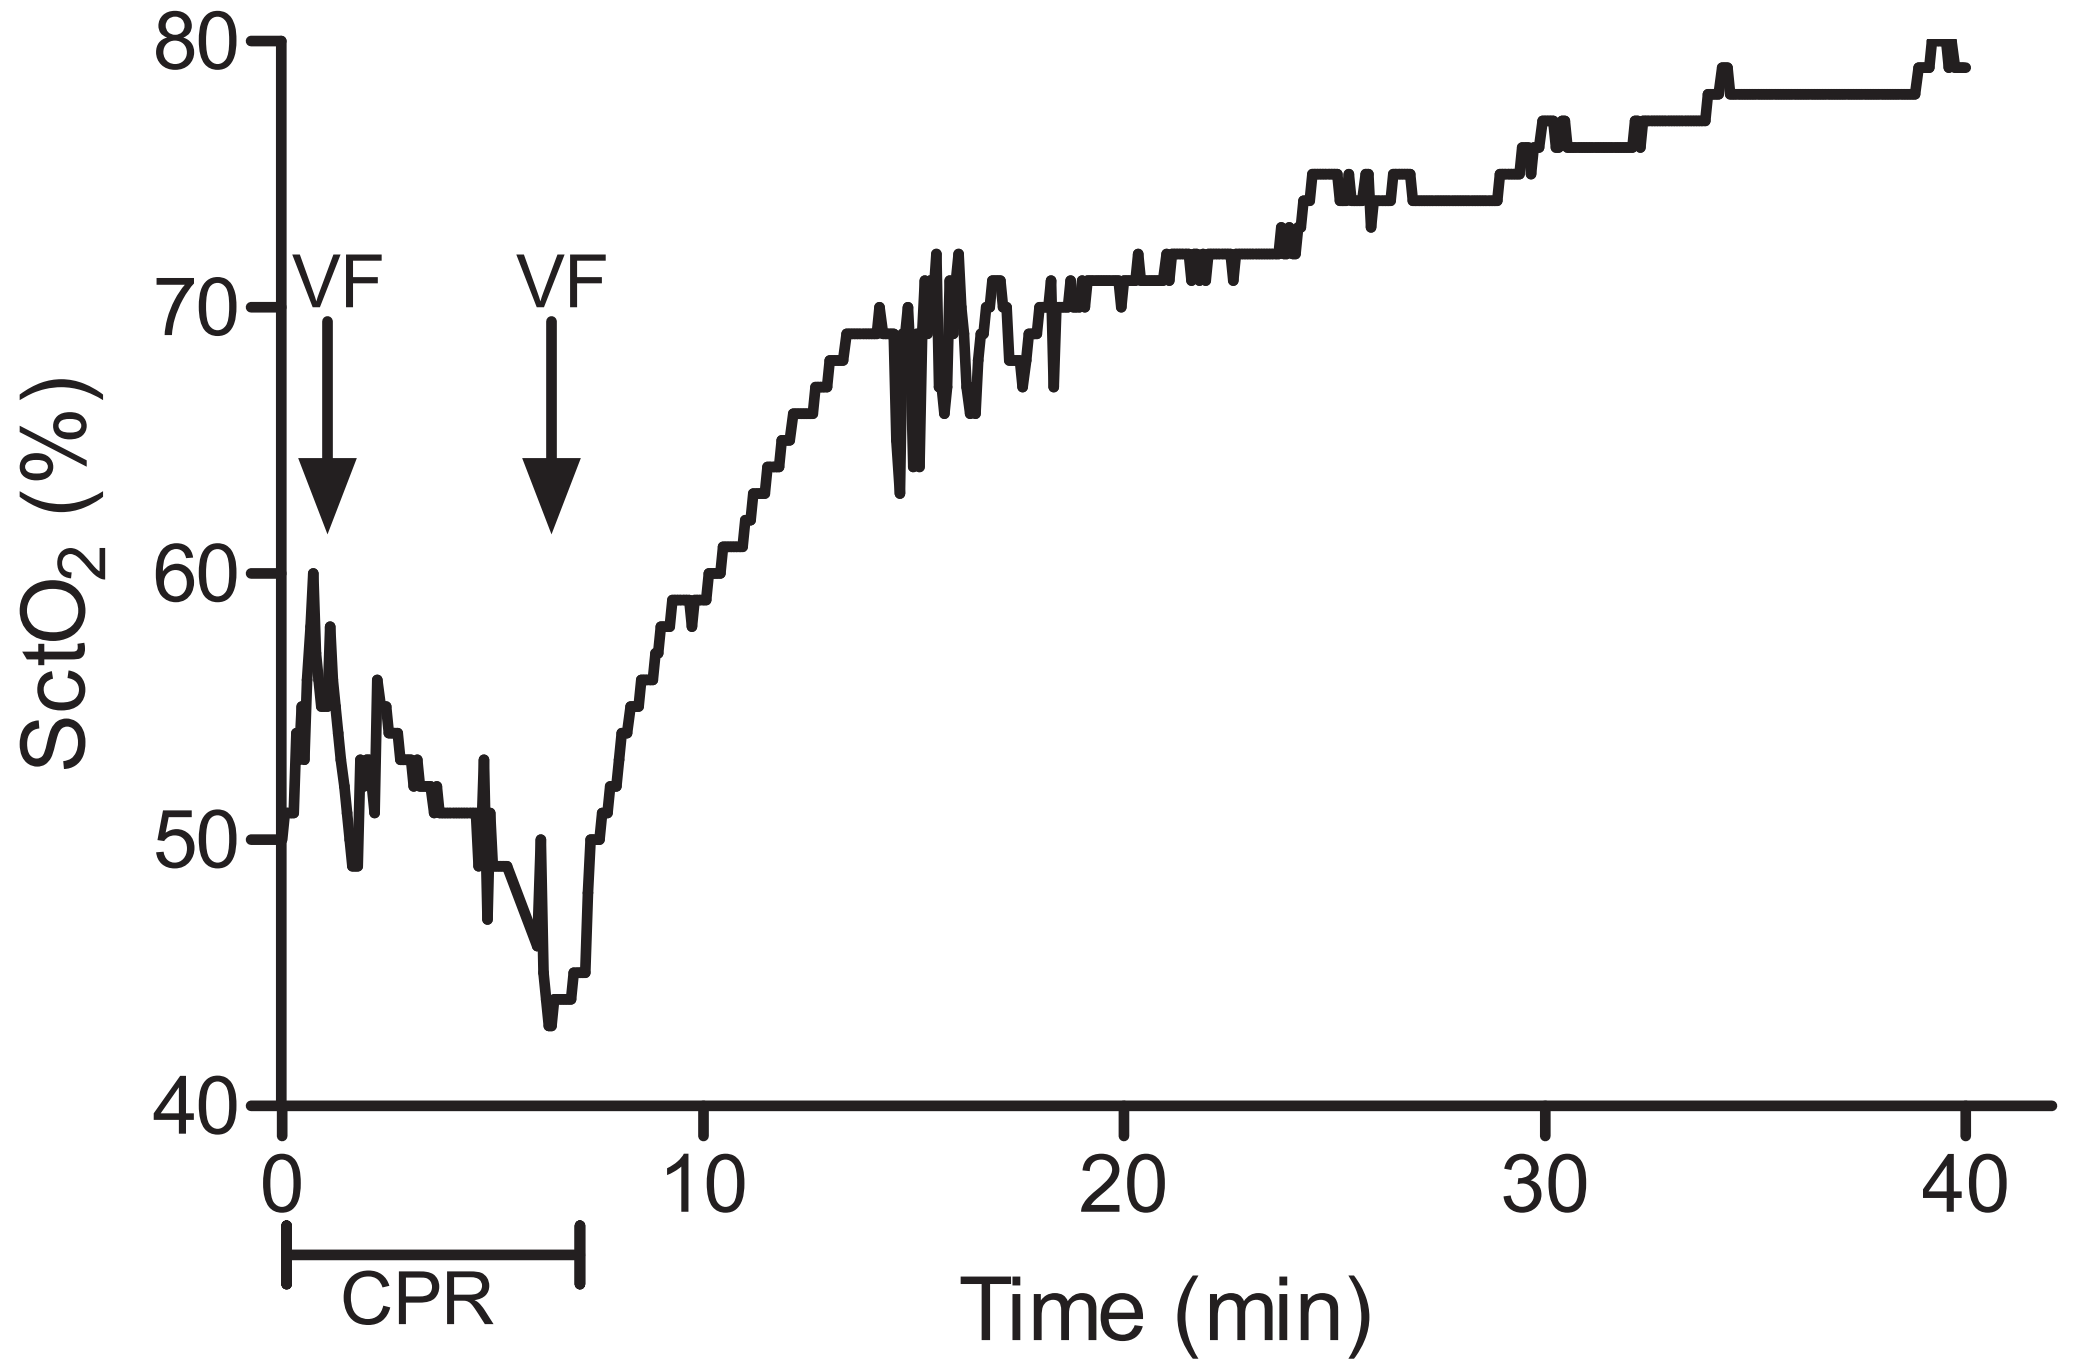

Supplement: MOESM2 [file 9711250]
